# Supplementary material for: Graft-versus-MDS effect after unrelated cord blood transplantation: a retrospective analysis of 752 patients registered at the Japanese Data Center for Hematopoietic Cell Transplantation
Source: PubMed Central journal article supplement (PMC6403210; doi:10.1038/s41408-019-0192-x), 2019-03-06
Supplement: 41408_2019_192_MOESM3_ESM.pdf [file 41408_2019_192_MOESM3_ESM.pdf]

Supplemental Table 2. CBT outcomes by bridging therapy and status at CBT.

a. Outcomes by bridging therapy.

| Factor                    | Group | All patients       |                      | Lower-risk MDS*    |         | Higher-risk MDS*   |         |
|---------------------------|-------|--------------------|----------------------|--------------------|---------|--------------------|---------|
|                           |       | 3-year OS (95%CI)  | P value              | 3-year OS (95%CI)  | P value | 3-year OS (95%CI)  | P value |
| Combination chemotherapy  |       |                    | P=0.11               |                    | P=0.34  |                    | P=0.33  |
|                           | yes   | 35.2% (28.5-42.0%) |                      | 43.3% (27.7-57.9%) |         | 33.2% (25.8-40.7%) |         |
|                           | no    | 43.4% (38.7-47.9%) |                      | 52.1% (43.6-60.0%) |         | 39.3% (33.7-44.7%) |         |
| Low-dose chemotherapy     |       |                    | P<9x10 <sup>-4</sup> |                    | P=0.093 |                    | P<0.007 |
|                           | yes   | 24.0% (15.0-34.3%) |                      | 27.9% (9.1-50.7%)  |         | 22.9% (13.1-34.4%) |         |
|                           | no    | 43.2% (39.1-47.2%) |                      | 53.0% (45.0-60.3%) |         | 39.2% (34.4-43.9%) |         |
| Azacitidine               |       |                    | P=0.12               |                    | P=0.25  |                    | P<0.02  |
|                           | yes   | 50.7% (40.1-60.4%) |                      | 45.2% (23.6-64.7%) |         | 52.8% (40.7-63.5%) |         |
|                           | no    | 39.7% (35.6-43.7%) |                      | 51.8% (43.8-59.2%) |         | 34.7% (30.0-39.4%) |         |
| Immunosuppressive therapy |       |                    | P=0.70               |                    | P=0.65  |                    | P<0.02  |
|                           | yes   | 37.7% (27.7-47.7%) |                      | 52.6% (38.1-65.2%) |         | 17.8% (7.5-31.7%)  |         |
|                           | no    | 41.5% (37.4-45.6%) |                      | 49.7% (40.7-57.9%) |         | 39.0% (34.3-43.6%) |         |
| Others                    |       |                    | P=0.89               |                    | P=0.53  |                    | P=0.14  |
|                           | yes   | 39.7% (31.2-48.0%) |                      | 52.3% (38.5-64.3%) |         | 30.3% (20.0-41.3%) |         |
|                           | no    | 41.2% (36.9-45.4%) |                      | 50.1% (41.0-58.6%) |         | 38.3% (33.4-43.1%) |         |
| No intensive therapy      |       | 45.0% (38.7-51.1%) |                      | 55.0% (41.9-66.4%) |         | 41.5% (34.3-48.5%) |         |

\*: Higher-risk MDS consists of refractory anemia of excess blast (RAEB); lower-risk MDS consists of other MDS subtypes.

†: overall P value.

‡: Patients who did not receive intensive bridging therapy (=no bridging cohort) were not evaluated for the effect.

Abbreviations: CBT, umbilical cord blood transplantation; CI, confidence interval; CR, complete remission; HI, hematological improvement; HR, hazard ratio; NE, not evaluable; OS, overall survival; PD, Progressive Disease; PR, partial remission; SD, stable disease.

b. Outcomes by status at CBT.

| Factor             | n   | All patients       |                | n  | Lower-risk MDS*    |                              | n   | Higher-risk MDS*   |                |
|--------------------|-----|--------------------|----------------|----|--------------------|------------------------------|-----|--------------------|----------------|
|                    |     | 3-year OS (95%CI)  | P value<0.03 † |    | 3-year OS (95%CI)  | P value<2x10 <sup>-5</sup> † |     | 3-year OS (95%CI)  | P value=0.07 † |
| CR                 | 85  | 49.9% (37.8-60.8%) |                | 26 | 61.0% (36.0-78.8%) |                              | 59  | 45.3% (31.6-58.1%) |                |
| PR/Hi              | 101 | 40.9% (29.0-52.5%) |                | 24 | 50.1% (25.8-70.3%) |                              | 77  | 38.1% (24.4-51.6%) |                |
| SD                 | 201 | 35.3% (28.4-42.2%) |                | 66 | 49.3% (36.1-61.2%) |                              | 135 | 27.8% (20.1-36.0%) |                |
| PD after remission | 14  | 21.4% (5.2-44.8%)  |                | 3  | NE                 |                              | 11  | 27.3% (6.5-53.9%)  |                |
| PD                 | 74  | 36.1% (23.7-48.6%) |                | 21 | 39.7% (18.6-60.2%) |                              | 53  | 34.2% (19.2-49.8%) |                |
| Not evaluated ‡    | 259 | 44.2% (37.8-50.5%) |                | 63 | 56.9% (43.2-68.5%) |                              | 196 | 39.9% (32.6-47.1%) |                |

P<2x10<sup>-6</sup>  
P<2x10<sup>-8</sup>  
P<0.001  
P=0.09  
P<1x10<sup>-4</sup>
